# Supplementary material
Source: publisher figshare collection journal article supplement (https://acs.figshare.com/ndownloader/files/4463227)
Supplement: Supplementary file 1 [file 4463227]

## Supplementary Information

### Theoretical Study on Adsorption and Dissociation of NO<sub>2</sub> Molecule on Fe(111) Surface

Hui-Lung Chen,<sup>\*,†</sup> Shiuan-Yau Wu,<sup>‡</sup> Hsin-Tsung Chen,<sup>⊥</sup> Jee-Gong Chang,<sup>⊥</sup>

Shin-Pon Ju,<sup>§</sup> Chiitang Tsai,<sup>†</sup> and Ling-Chieh Hsu<sup>‡</sup>

<sup>†</sup>Department of Chemistry and Institute of Applied Chemistry, Chinese Culture University, Taipei, 111, Taiwan

<sup>‡</sup>Department of Chemistry National Taiwan Normal University 88, Section 4, Tingchow Road, Taipei 116, Taiwan

<sup>⊥</sup>National Center for High-Performance Computing, No. 28, Nan-Ke Third Road, Hsin-Shi, Tainan, 74147, Taiwan

<sup>§</sup>Department of Mechanical and Electro-Mechanical Engineering; Center for Nanoscience and Nanotechnology, National Sun-Yat-Sen University Kaohsiung, 80424, Taiwan

\*Corresponding authors. E-mail: [chl3@faculty.pccu.edu.tw](mailto:chl3@faculty.pccu.edu.tw)

Tel: +886-2-28610511 ext 25313

Fax: +886-2-28614212

**Table S1.** Convergence tests for adsorption energies with different number of layers.

| site                                         | number of layers | E <sub>ads</sub> (kcal/mol) |
|----------------------------------------------|------------------|-----------------------------|
| FeNO <sub>2</sub> (S-μ <sub>3</sub> -N,O,O') | 6-layer model    | -64.59                      |
|                                              | 9-layer model    | -65.28                      |

**Table S2.** Convergence tests for adsorption energies with constant  $k$ -point and varied cut-off energies.

| site                                   | $k$ -point | cut-off energy (eV) | $E_{\text{ads}}$ (kcal/mol) |
|----------------------------------------|------------|---------------------|-----------------------------|
| FeNO <sub>2</sub> (S- $\mu_3$ -N,O,O') | 4×4×1      | 400                 | -64.59                      |
|                                        |            | 450                 | -63.71                      |
|                                        |            | 500                 | -63.61                      |
|                                        |            | 550                 | -63.67                      |
|                                        |            | 600                 | -63.71                      |
|                                        |            | 650                 | -63.71                      |
|                                        |            | 700                 | -63.97                      |
|                                        |            | 750                 | -64.20                      |
|                                        |            | 800                 | -64.18                      |

**Table S3.** Convergence tests for adsorption energies with constant cut-off energy and varied  $k$ -points.

| site                                   | cut-off energy (eV) | $k$ -points | $E_{\text{ads}}$ (kcal/mol) |
|----------------------------------------|---------------------|-------------|-----------------------------|
| FeNO <sub>2</sub> (S- $\mu_3$ -N,O,O') | 400                 | 4×4×1       | -64.59                      |
|                                        |                     | 5×5×1       | -64.87                      |
|                                        |                     | 6×6×1       | -64.74                      |
|                                        |                     | 7×7×1       | -64.29                      |
|                                        |                     | 8×8×1       | -64.53                      |
